# Supplementary material for: Effects of the location of the Al species in hierarchical ZSM-11 on its catalytic performances in the methanol-to-propylene process
Source: Royal Society of Chemistry journal article supplement (doi:10.1039/d5cy01063b), 2025-11-28
Supplement: d5cy01063b1.pdf [file d5cy01063b1.pdf]

*SUPPORTING INFORMATION*

**Effects of location of Al-species in hierarchical ZSM-11 on its catalytic performances in methanol to propylene**

Qihao Wu, Zhuo Ji, Jiahui Zhang, Qirui Jiao, Zhongxu Wang, Yi Liu, Weijiong Dai\*, Yan

Wang, Wenlin Li, Jiajun Zheng \*, Ruifeng Li\*

*(College of Chemistry and Chemical Engineering, Research Centre of Energy Chemical & Catalytic Technology, Taiyuan University of Technology, Taiyuan 030024, China)*

\*Corresponding Author:

Email: daiweijiong@tyut.edu.cn; zhengjiajun@tyut.edu.cn; rfli@tyut.edu.cn. TEL: +86 03516018384

Post Address:

College of Chemical Engineering and Technology, Taiyuan University of Technology 79# West Yingze Street, Taiyuan 030024, China

**Table S1** Proportion of integrated peaks obtained by curve fitting of the  $^{29}\text{Si}$  MAS NMR for various ZSM-11-x zeolites

| Samples    | $\text{SiO}_2/\text{Al}_2\text{O}_3$<br>ratio <sup>a</sup> | Si(3Si, 1Al) sites (%)<br>(-106.0 ppm) | Si(4Si, 0Al) sites (%) |               |               |               |
|------------|------------------------------------------------------------|----------------------------------------|------------------------|---------------|---------------|---------------|
|            |                                                            |                                        | -110.4<br>ppm          | -112.3<br>ppm | -113.7<br>ppm | -115.7<br>ppm |
| ZSM-11-60  | 49.01                                                      | 16.32                                  | 13.13                  | 32.94         | 24.63         | 12.97         |
| ZSM-11-90  | 76.92                                                      | 10.40                                  | 18.76                  | 32.43         | 25.67         | 12.74         |
| ZSM-11-120 | 98.40                                                      | 8.13                                   | 14.60                  | 38.02         | 24.28         | 14.97         |
| ZSM-11-160 | 132.89                                                     | 6.02                                   | 14.32                  | 43.82         | 22.36         | 13.48         |

<sup>a</sup>The framework  $\text{SiO}_2/\text{Al}_2\text{O}_3$  ratio is obtained from the  $^{29}\text{Si}$  MAS NMR deconvolution results, according to the equation of  $\text{Si}/\text{Al} = (I_{Q4} + I_{Q3})/0.25I_{Q3}$ , where  $I_{Q4}$  and  $I_{Q3}$  are the intensity of  $Q_4$  ( $\text{Si}(\text{OSi})_4$ ) and  $Q_3$  ( $\text{Si}(\text{OAl})_1(\text{OSi})_3$ ) peaks, respectively. In the  $^{29}\text{Si}$  MAS NMR spectra, four  $Q_4$  ( $\text{Si}(\text{OSi})_4$ ) peaks around -115.7, -113.7, -112.3 and -110.4 ppm appear, while the peak at about-106 ppm is assigned to the  $Q_3$  ( $\text{Si}(\text{OAl})_1(\text{OSi})_3$ ) peaks.

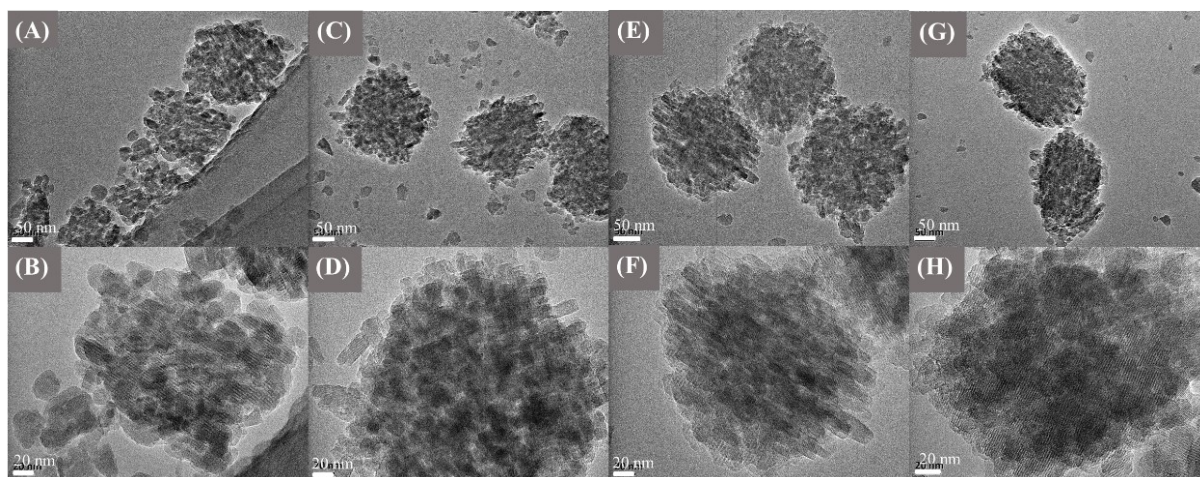

**Figure S1** TEM images of the as-synthesized ZSM-11-x. (A) and (B): ZSM-11-60; (C) and (D): ZSM-11-90; (E) and (F): ZSM-11-120; (G) and (H): ZSM-11-160

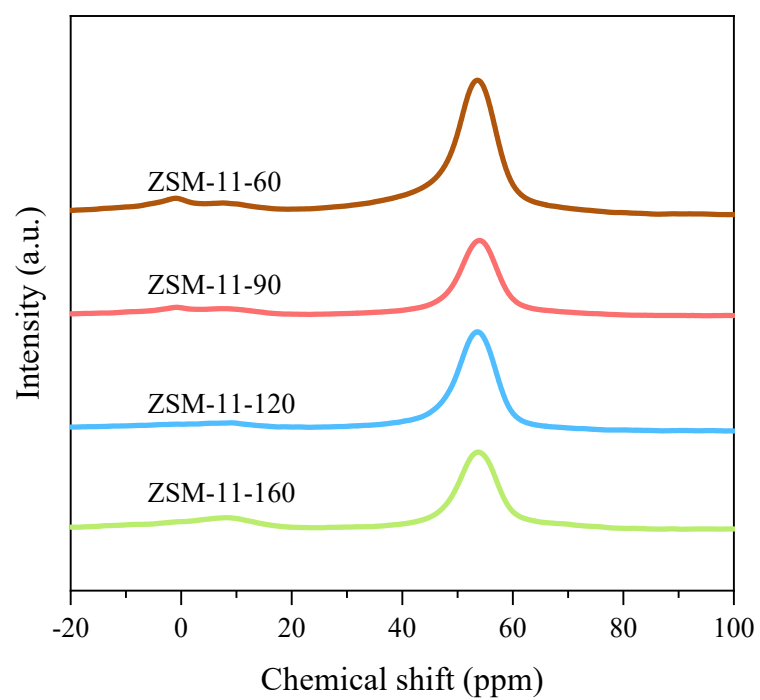

**Figure S2**  $^{27}\text{Al}$  MAS NMR spectra of the samples ZSM-11-*x*.

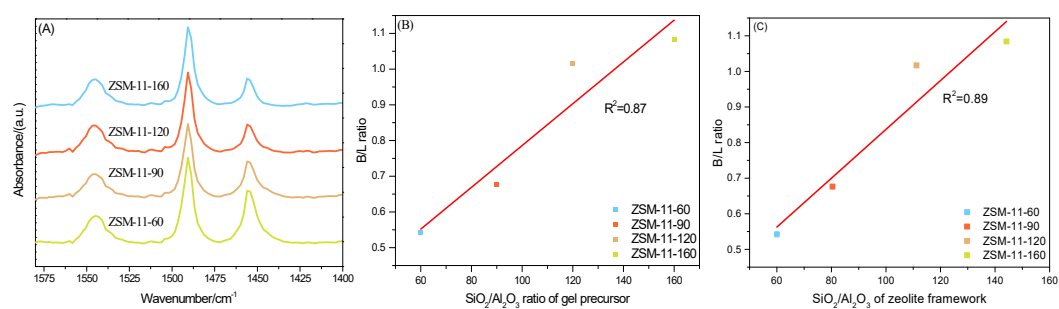

**Figure S3** The infrared spectra of pyridine absorbed at 623 k (A); Influence of change in the Si/Al ratio of the gel precursors on the B/L ratio (B); Influence of changed Si/Al ratio of zeolite framework on the B/L ratio (C)

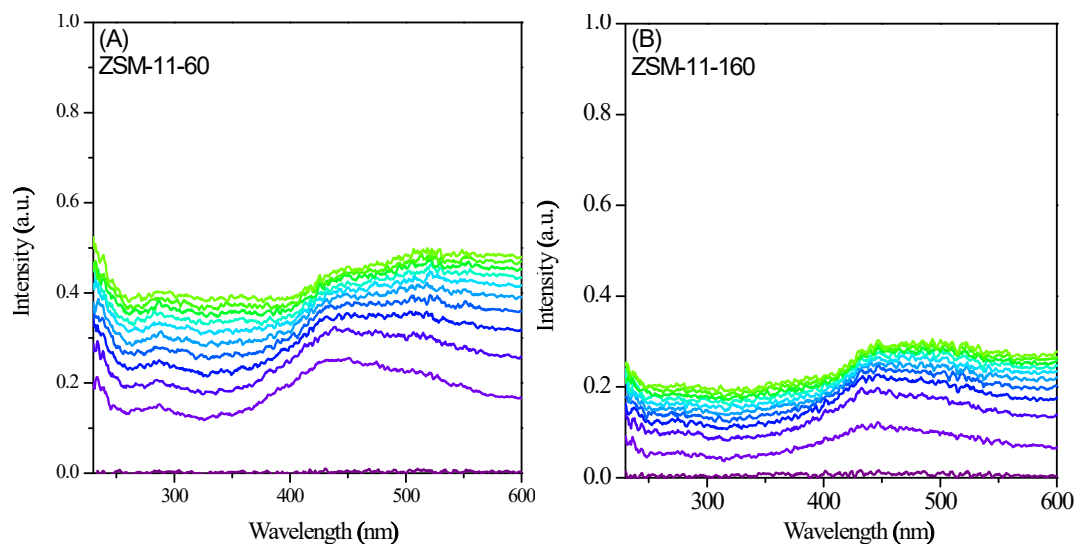

**Figure S4** In situ UV/vis spectra recorded during the MTO conversion on ZSM-11-60 and ZSM-11-160 zeolite samples at the reaction temperature of 430 °C. The band at ~250-290 and 400-500 nm is attributed to neutral alkylated benzenes/carbenium ions and the bicyclic species of aromatics with different degrees of methylation[1-3], respectively. Whereas, the band above 500 nm is assigned to highly condensed polycyclic aromatics (e.g., phenanthrenic/anthracenic species)[4]. Clearly, in comparison with the sample ZSM-11-60, the sample ZSM-11-160 shows a much slower increase rate at these band. The results further well explain the superior catalytic performance for highly catalytic stability of ZSM-11-160 in MTP reaction.

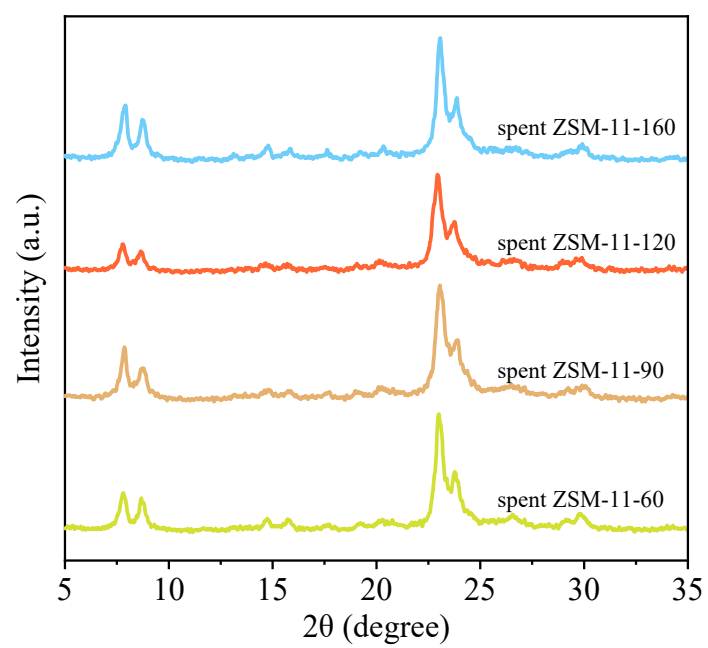

**Figure S5** XRD pattern of the spent ZSM-11-x samples.

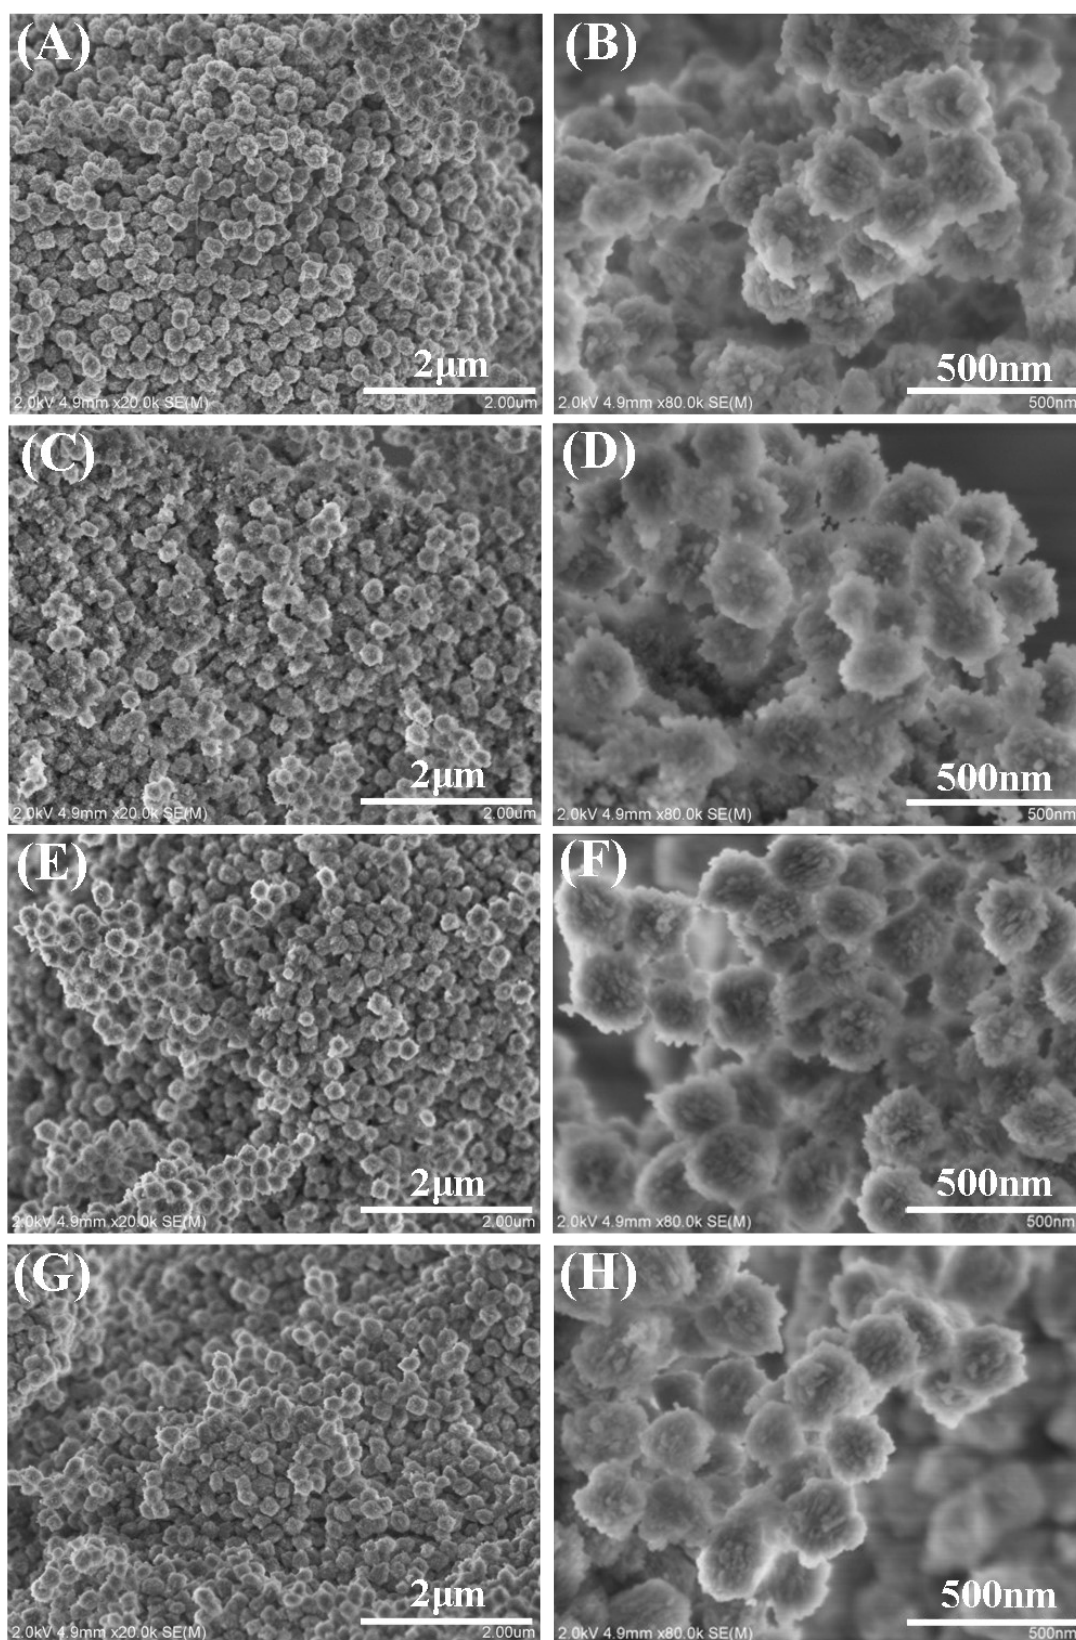

**Figure S6** SEM images of the spent ZSM-11-*x*. (A), (B): spent ZSM-11-60; (C), (D): spent ZSM-11-90  
(E), (F): spent ZSM-11-120 ; (G), (H): spent ZSM-11-160



## References:

- 1 W. Dai, L. Yang, C. Wang, X. Wang, G. Wu, N. Guan, U. Obenaus, M. Hunger and L. Li, *ACS Catal.*, 2018, **8**, 1352-1362.
- 2 E. Borodina, H. Sharbini Harun Kamaluddin, F. Meirer, M. Mokhtar, A. M. Asiri, S. A. Al-Thabaiti, S. N. Basahel, J. Ruiz-Martinez and B. M. Weckhuysen, *ACS Catal.*, 2017, **7**, 5268-5281.
- 3 W. Dai, Z. Liu, J. Zhao, Y. Wang, J. Zheng and R. Li, *Appl. Catal., A*, 2024, **684**, 119912.
- 4 K. Hemelsoet, Q. Qian, T. De Meyer, K. De Wispelaere, B. De Sterck, B. M. Weckhuysen, M. Waroquier and V. Van Speybroeck, *Chemistry*, 2013, **19**, 16595-16606.
